# Supplementary material for: The adenine-modified edible chitosan films containing choline chloride and citric acid mixture
Source: Springer Nature journal article supplement (doi:10.1038/s41598-023-39870-4), 2023-08-03
Supplement: MOESM1 [file 41598_2023_39870_MOESM1_ESM.pdf]

# The adenine-modified edible chitosan films containing choline chloride and citric acid mixture

Magdalena Gierszewska\*, Ewelina Jakubowska and Agnieszka Richert

\* Correspondence: mgd@chem.umk.pl; Tel.: +48-56-611-45-24; Fax: +48-56-611-45-26

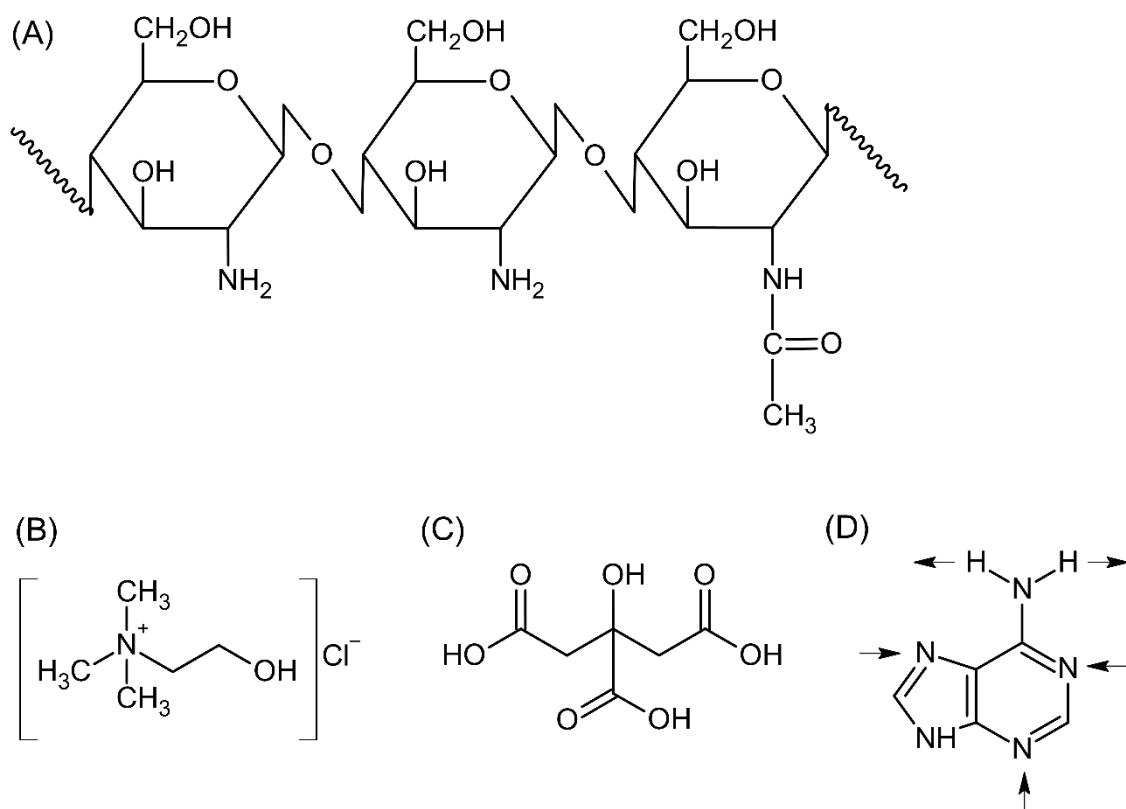

Figure S1. Chemical structure of (A) chitosan, (B) choline chloride, (C) citric acid, (D) adenine (arrow denotes atoms acting as an H-donor or H-acceptor)

# The adenine-modified edible chitosan films containing choline chloride and citric acid mixture

Magdalena Gierszewska\*, Ewelina Jakubowska and Agnieszka Richert

\* Correspondence: mgd@chem.umk.pl; Tel.: +48-56-611-45-24; Fax: +48-56-611-45-26

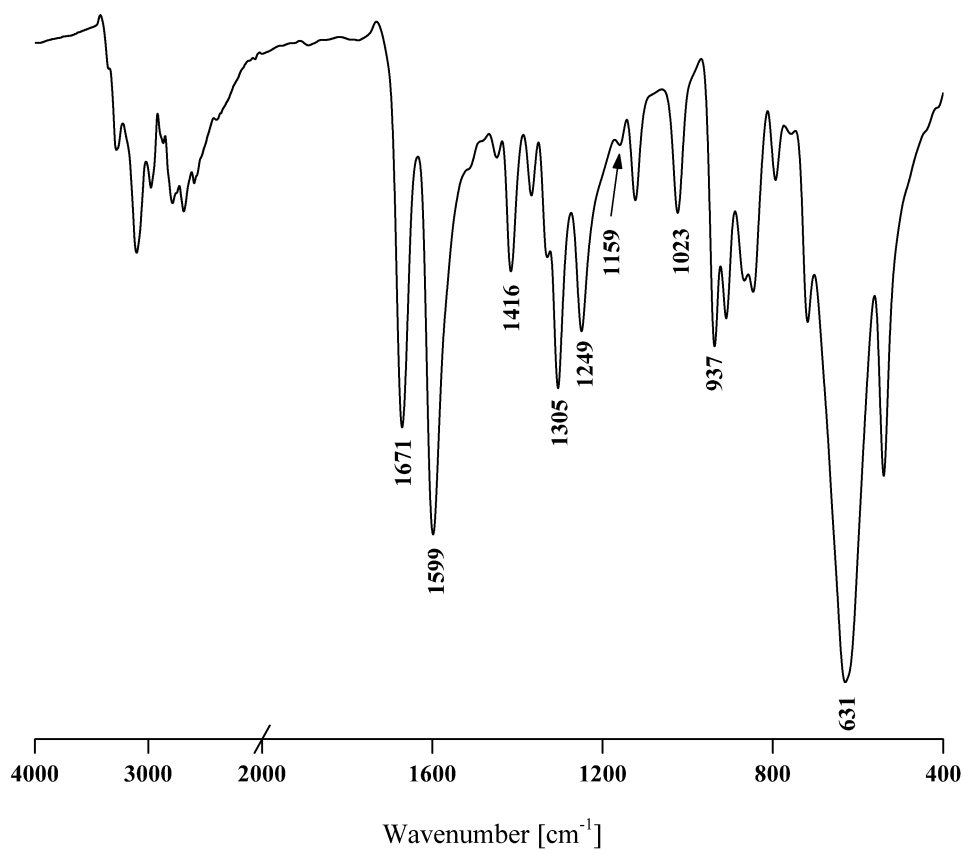

Figure S2. FTIR spectrum of adenine

# The adenine-modified edible chitosan films containing choline chloride and citric acid mixture

Magdalena Gierszewska\*, Ewelina Jakubowska and Agnieszka Richert

\* Correspondence: mgd@chem.umk.pl; Tel.: +48-56-611-45-24; Fax: +48-56-611-45-26

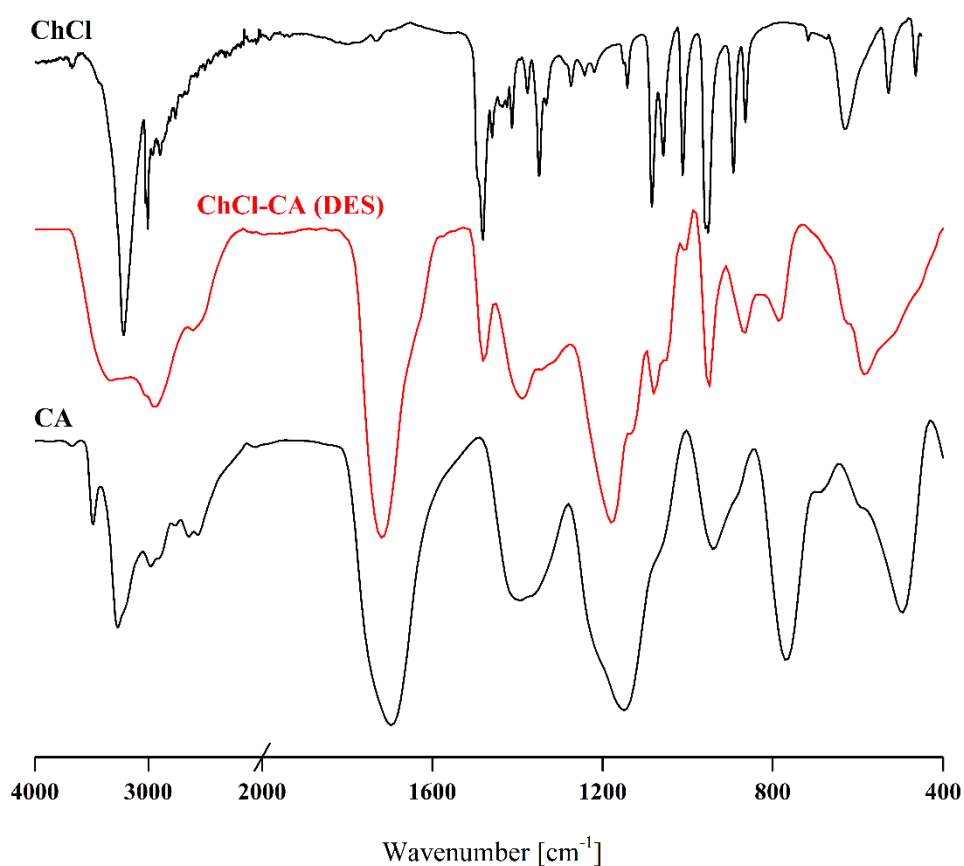

Figure S3. FTIR spectra of deep eutectic solvent (DES, ChCl-CA equimolar mixture) and its neat components (choline chloride and citric acid)

# The adenine-modified edible chitosan films containing choline chloride and citric acid mixture

Magdalena Gierszewska\*, Ewelina Jakubowska and Agnieszka Richert

\* Correspondence: mgd@chem.umk.pl; Tel.: +48-56-611-45-24; Fax: +48-56-611-45-26

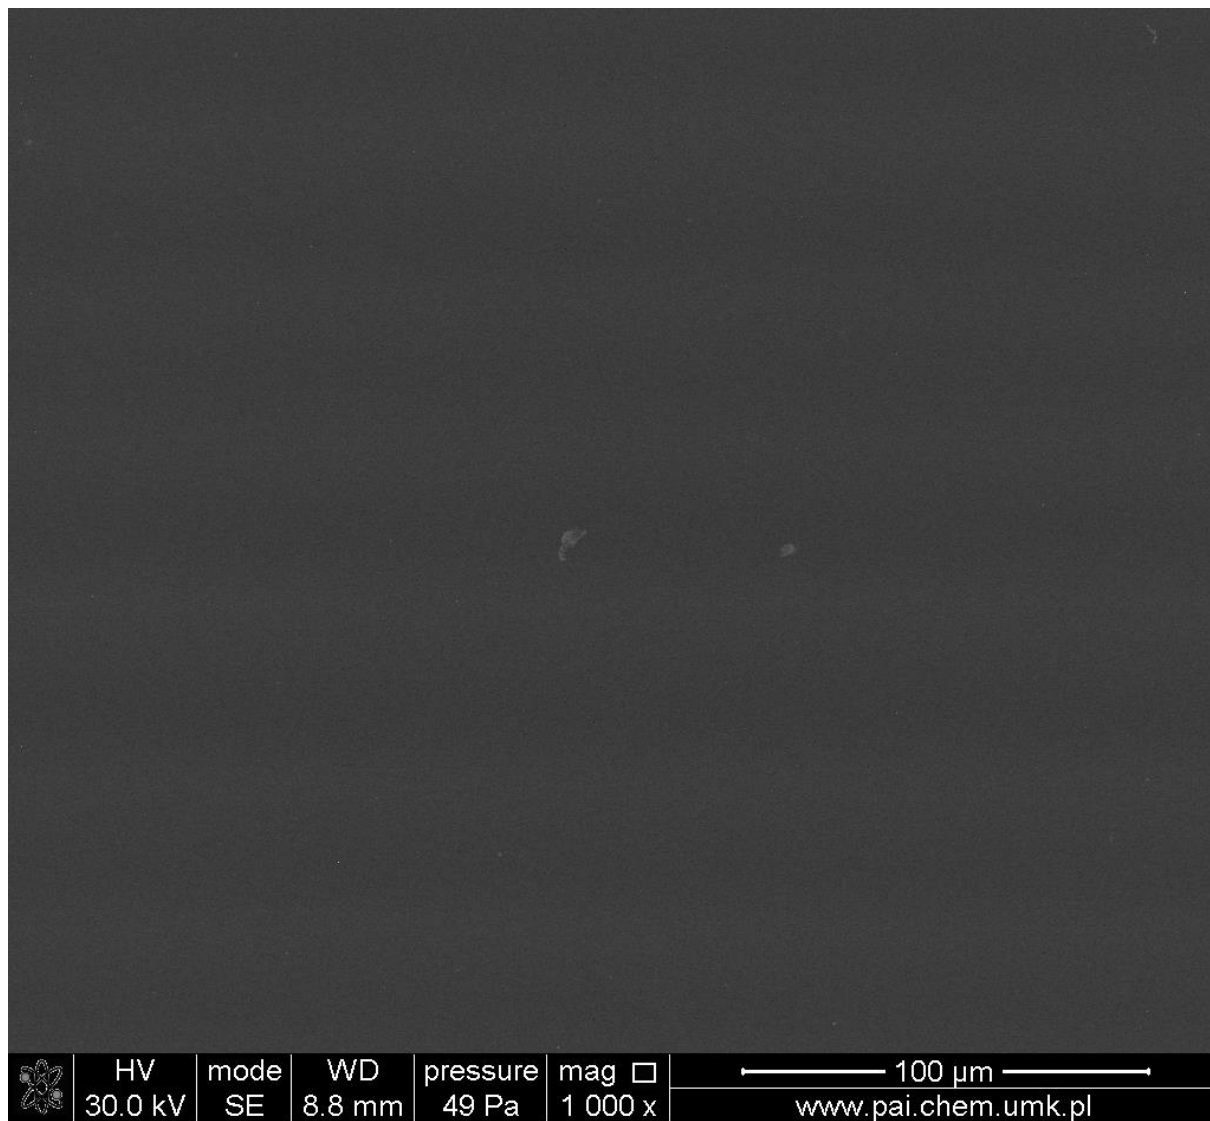

Figure S4a. SEM image of the Ch film surface (1000x)

# The adenine-modified edible chitosan films containing choline chloride and citric acid mixture

Magdalena Gierszewska\*, Ewelina Jakubowska and Agnieszka Richert

\* Correspondence: mgd@chem.umk.pl; Tel.: +48-56-611-45-24; Fax: +48-56-611-45-26

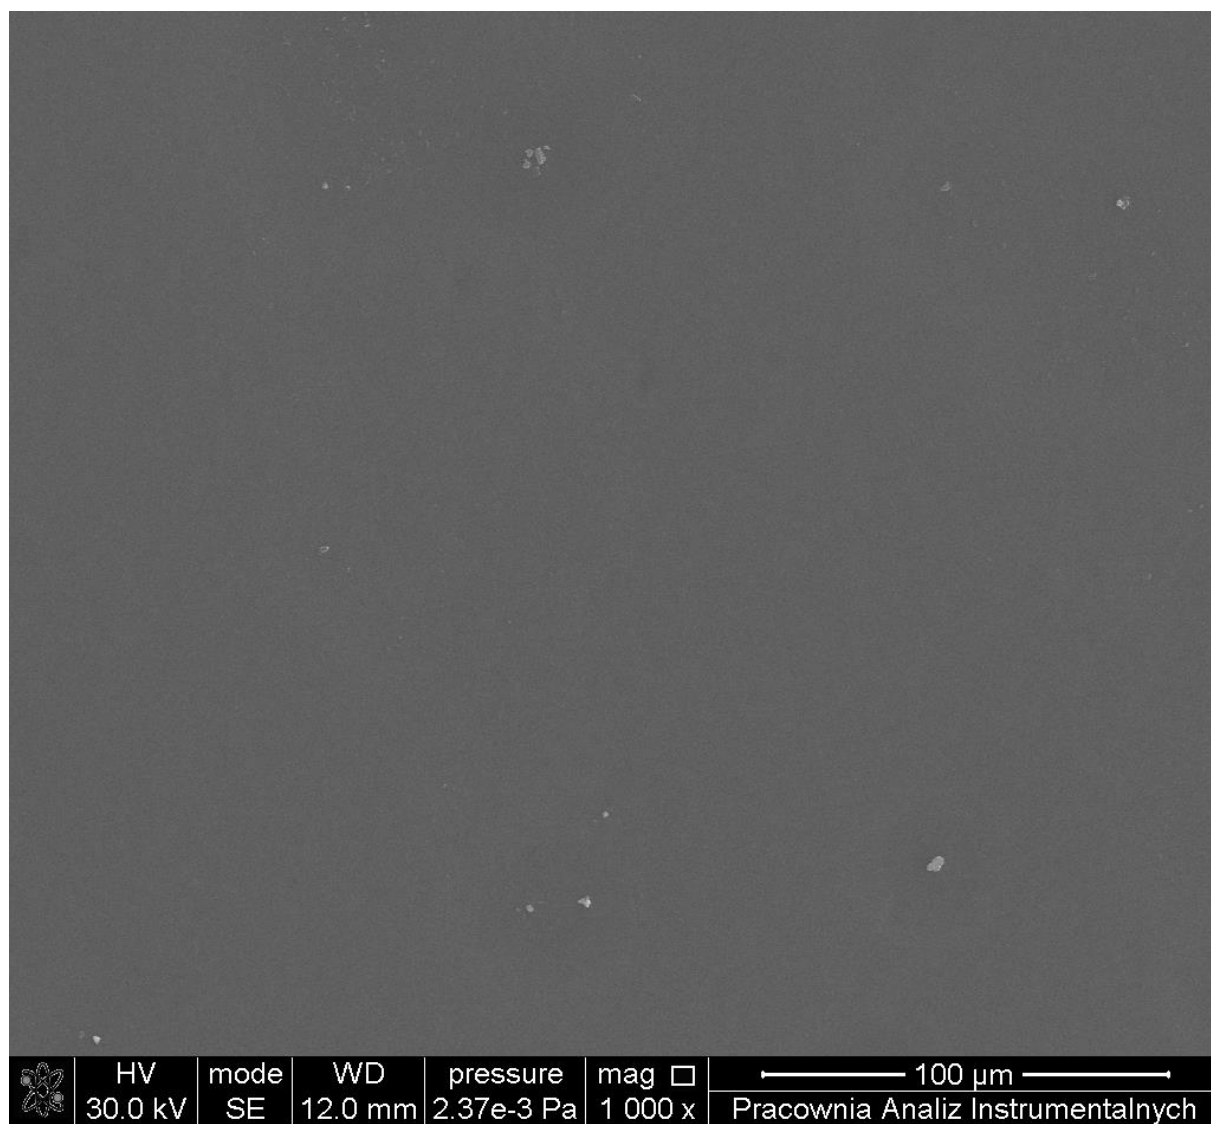

Figure S4b. SEM image of the Ch-DES film surface (1000x)

# The adenine-modified edible chitosan films containing choline chloride and citric acid mixture

Magdalena Gierszewska\*, Ewelina Jakubowska and Agnieszka Richert

\* Correspondence: mgd@chem.umk.pl; Tel.: +48-56-611-45-24; Fax: +48-56-611-45-26

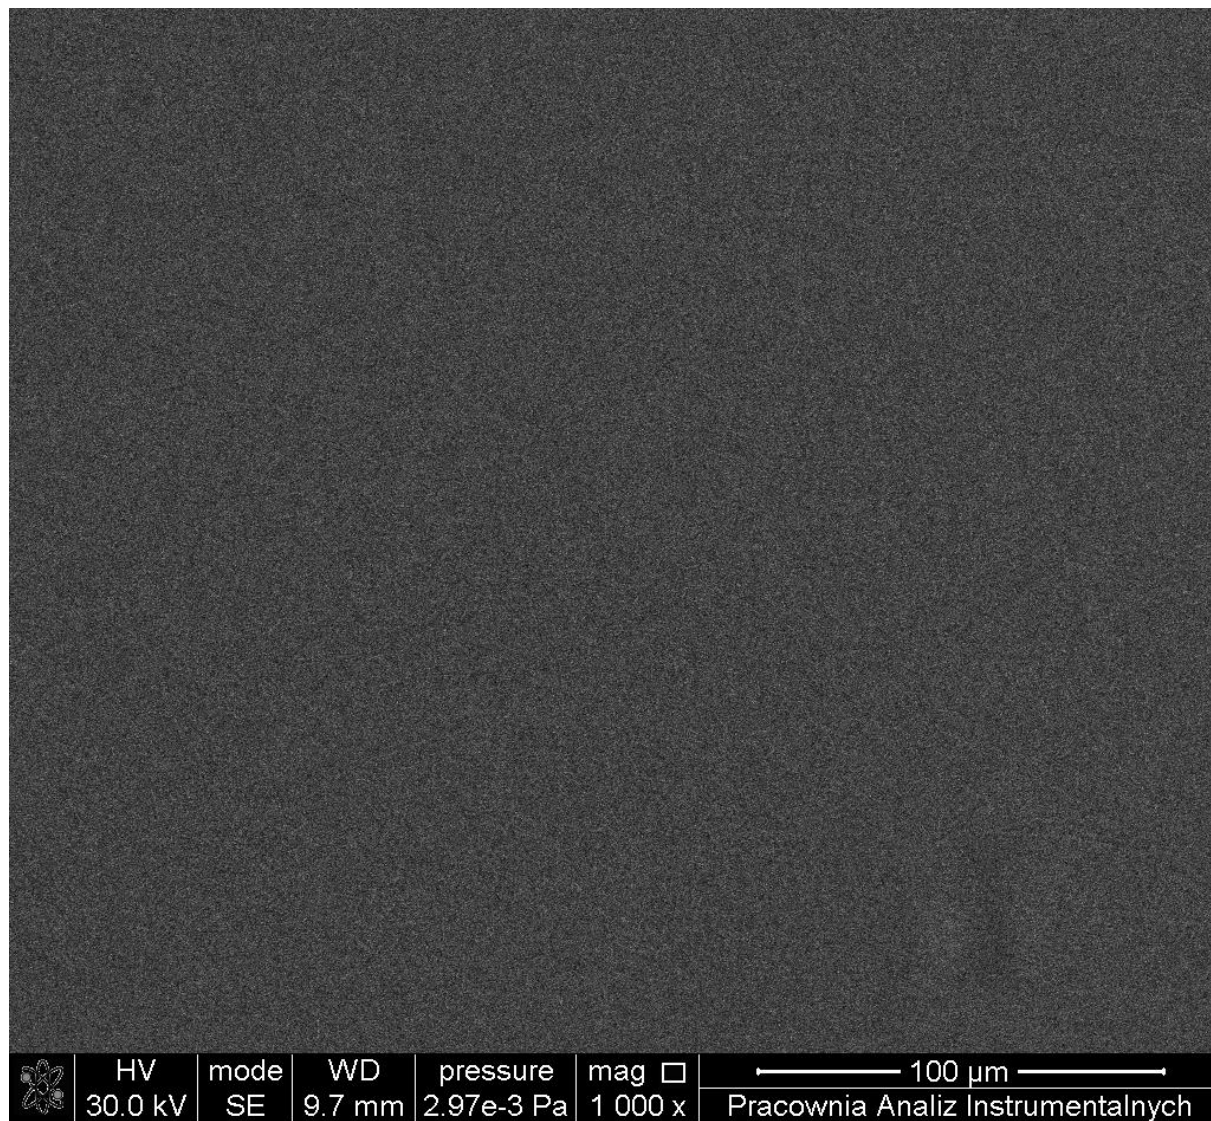

Figure S4c. SEM image of the Ch-DES-A1 film surface (1000x)

# The adenine-modified edible chitosan films containing choline chloride and citric acid mixture

Magdalena Gierszewska\*, Ewelina Jakubowska and Agnieszka Richert

\* Correspondence: mgd@chem.umk.pl; Tel.: +48-56-611-45-24; Fax: +48-56-611-45-26

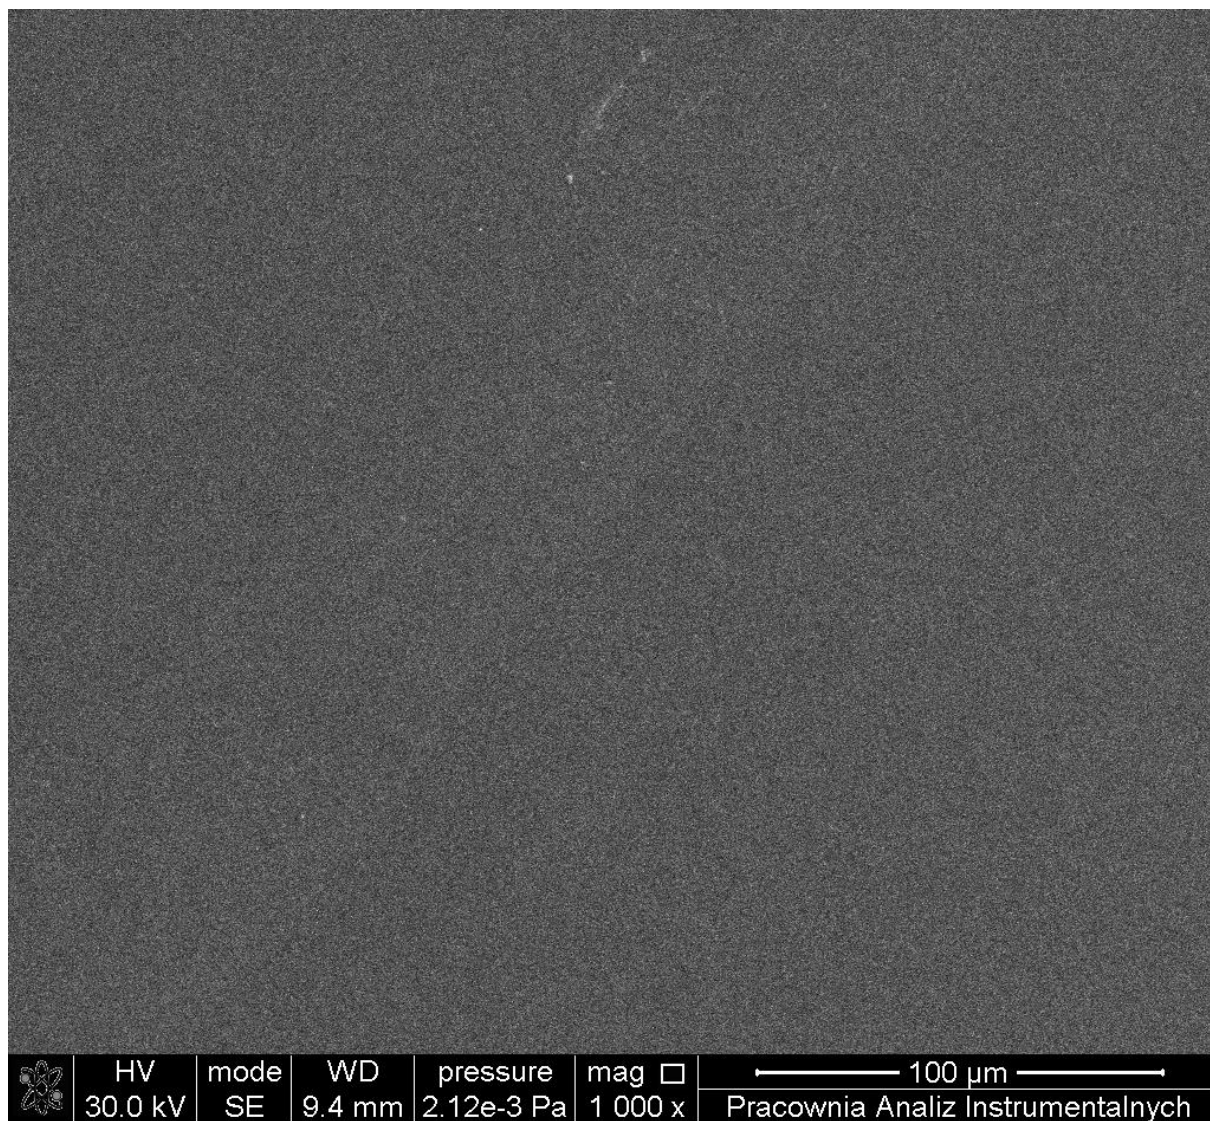

Figure S4d. SEM image of the Ch-DES-A1 film surface (1000x)



# The adenine-modified edible chitosan films containing choline chloride and citric acid mixture

Magdalena Gierszewska\*, Ewelina Jakubowska and Agnieszka Richert

\* Correspondence: mgd@chem.umk.pl; Tel.: +48-56-611-45-24; Fax: +48-56-611-45-26

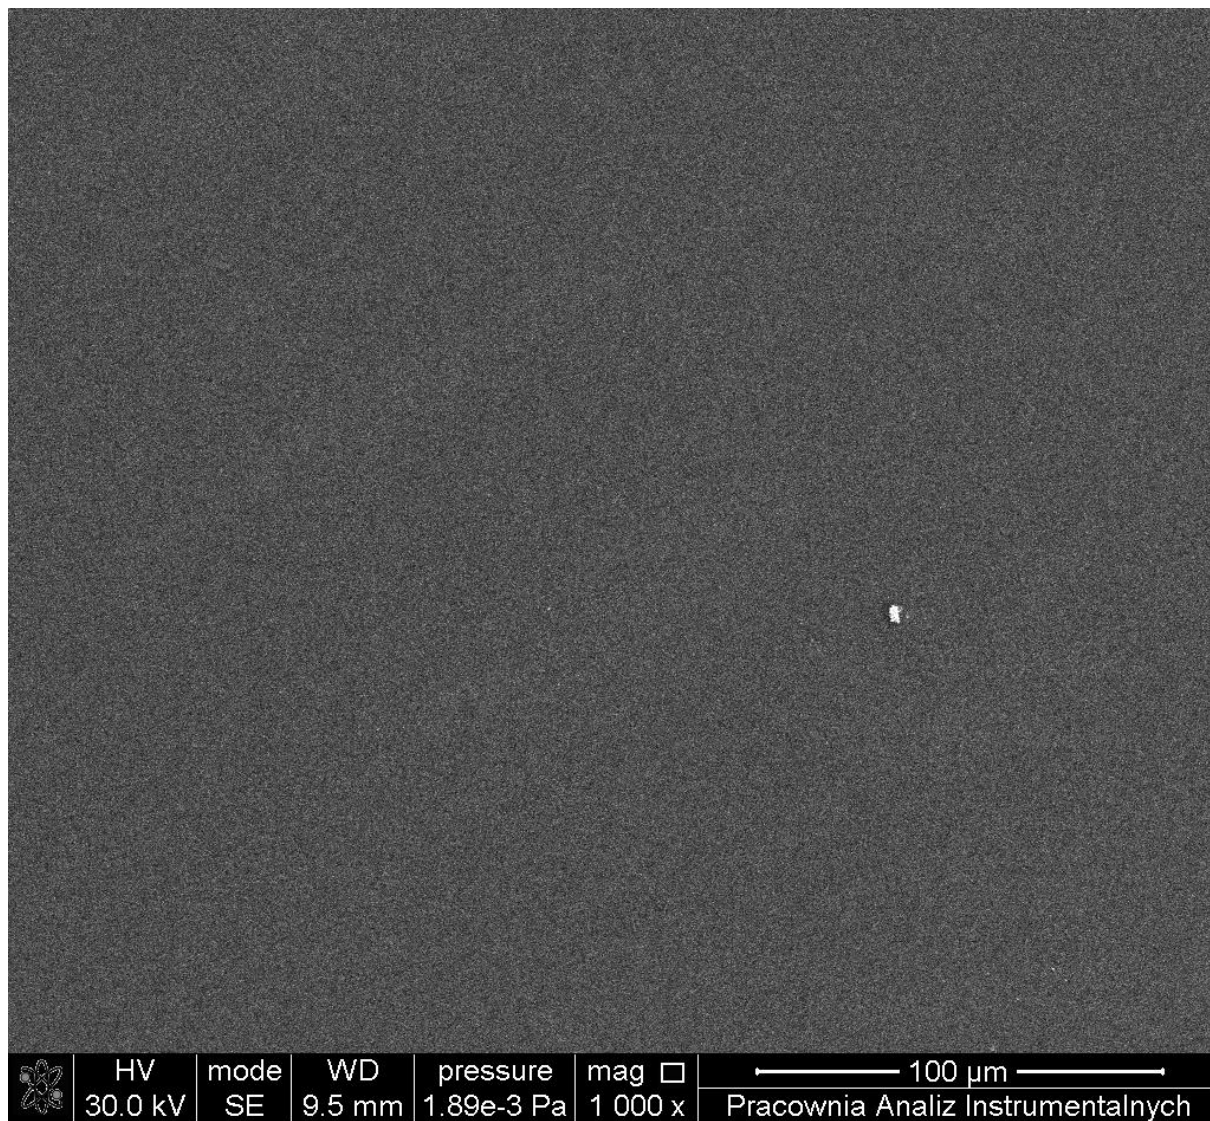

Figure S4e. SEM image of the Ch-DES-A1 film surface (1000x)



# The adenine-modified edible chitosan films containing choline chloride and citric acid mixture

Magdalena Gierszewska\*, Ewelina Jakubowska and Agnieszka Richert

\* Correspondence: mgd@chem.umk.pl; Tel.: +48-56-611-45-24; Fax: +48-56-611-45-26

Table S1. Antibacterial effect of antibacterial treatment (ISO 20645, 2006)

| Braking zone<br>[mm]<br>The average<br>value of rise | Growth <sup>a)</sup> | Description                                                                                                                     | Rating                 |
|------------------------------------------------------|----------------------|---------------------------------------------------------------------------------------------------------------------------------|------------------------|
| >1                                                   | lack                 | Inhibition zone above 1, no increase <sup>b)</sup>                                                                              |                        |
| 1 - 0                                                | lack                 | Growth inhibition zone up to 1, no growth <sup>b)</sup>                                                                         | Good effect            |
| 0                                                    | lack                 | No braking zone, no increase <sup>c)</sup>                                                                                      |                        |
| 0                                                    | weak                 | Lack of braking zones, only some colonies<br>limited growth almost completely stopped <sup>d)</sup>                             | Limited<br>Efficiency  |
| 0                                                    | average              | No braking zone, height reduced to half<br>compared to control <sup>e)</sup>                                                    |                        |
| 0                                                    | powerful             | Lack of braking zones, the absence of a<br>reduction in growth compared to the control,<br>or only a slight reduction in growth | Insufficient<br>effect |

<sup>a)</sup> Bacterial growth on the medium under the working sample.

<sup>b)</sup> The dynamometer range should only be partially taken into account in the calculations.  
An increase in the braking zone may be due to excess active substance or unevenness of the substance in the article.

<sup>c)</sup> Lack of growth with a simultaneous lack of braking zone can be considered a good effect.  
A braking zone may not be possible due to limited diffusion.

<sup>d)</sup> "Almost as good as lack of growth" - an indication of limited efficiency.

<sup>e)</sup> Limited bacterial growth density means both the number of colonies and the diameter of the colonies.

# The adenine-modified edible chitosan films containing choline chloride and citric acid mixture

Magdalena Gierszewska\*, Ewelina Jakubowska and Agnieszka Richert

\* Correspondence: mgd@chem.umk.pl; Tel.: +48-56-611-45-24; Fax: +48-56-611-45-26

Table S2. ANOVA significance analysis of the influence of the adenine content on the different chitosan-DES films' parameters (statistically significant differences versus the adenine content reflects  $p < 0.05$ )

| Parameter  |                | Sum of squares | df | Mean Square | F-Value | p-Value |
|------------|----------------|----------------|----|-------------|---------|---------|
| L          | Between groups | 47.120         | 3  | 15.707      | 13.778  | 0.002   |
|            | Within groups  | 9.120          | 8  | 1.140       |         |         |
|            | Total          | 56.240         | 11 |             |         |         |
| a          | Between groups | 15.363         | 3  | 5.121       | 219.464 | <0.001  |
|            | Within groups  | 0.187          | 8  | 0.023       |         |         |
|            | Total          | 15.549         | 11 |             |         |         |
| b          | Between groups | 29.062         | 3  | 9.687       | 91.535  | <0.001  |
|            | Within groups  | 0.847          | 8  | 0.106       |         |         |
|            | Total          | 29.909         | 11 |             |         |         |
| $\Delta E$ | Between groups | 54.007         | 3  | 18.002      | 24.083  | <0.001  |
|            | Within groups  | 5.980          | 8  | 0.747       |         |         |
|            | Total          | 59.987         | 11 |             |         |         |
| Chroma     | Between groups | 52.989         | 3  | 17.663      | 83.120  | <0.001  |
|            | Within groups  | 1.700          | 8  | 0.213       |         |         |
|            | Total          | 54.689         | 11 |             |         |         |
| Hue        | Between groups | 15.603         | 3  | 5.201       | 0.297   | 0.827   |
|            | Within groups  | 140.200        | 8  | 17.525      |         |         |
|            | Total          | 155.802        | 11 |             |         |         |
| Opacity    | Between groups | 0.849          | 3  | 0.283       | 230.940 | <0.001  |
|            | Within groups  | 0.020          | 16 | 0.001       |         |         |
|            | Total          | 0.869          | 19 |             |         |         |
| Thickness  | Between groups | 0.000          | 3  | 0.000       | 30.145  | <0.001  |
|            | Within groups  | 0.000          | 8  | 0.000       |         |         |
|            | Total          | 0.000          | 11 |             |         |         |
| Density    | Between groups | 0.307          | 3  | 0.102       | 174.734 | <0.001  |
|            | Within groups  | 0.005          | 8  | 0.001       |         |         |
|            | Total          | 0.311          | 11 |             |         |         |
| WVTR       | Between groups | 835.709        | 3  | 278.570     | 91.660  | <0.001  |
|            | Within groups  | 24.313         | 8  | 3.039       |         |         |
|            | Total          | 860.023        | 11 |             |         |         |
| WVP        | Between groups | 14.569         | 3  | 4.856       | 104.065 | <0.001  |
|            | Within groups  | 0.373          | 8  | 0.047       |         |         |
|            | Total          | 14.943         | 11 |             |         |         |
| OPR        | Between groups | 5.963          | 3  | 1.988       | 10.415  | 0.004   |
|            | Within groups  | 1.527          | 8  | 0.191       |         |         |
|            | Total          | 7.489          | 11 |             |         |         |
| DPPH       | Between groups | 264.629        | 3  | 88.210      | 15.794  | <0.001  |

|                               |                |         |    |         |        |        |
|-------------------------------|----------------|---------|----|---------|--------|--------|
|                               | Within groups  | 89.360  | 16 | 5.585   |        |        |
|                               | Total          | 353.989 | 19 |         |        |        |
| H <sub>2</sub> O <sub>2</sub> | Between groups | 357.313 | 3  | 119.104 | 19.633 | <0.001 |
|                               | Within groups  | 48.533  | 8  | 6.067   |        |        |
|                               | Total          | 405.847 | 11 |         |        |        |
